# Supplementary material for: Assessing Pruritus in Hidradenitis Suppurativa: A Cross-Sectional Study
Source: PubMed Central journal article supplement — Am J Clin Dermatol. 2017 Apr 20;18(5):687–95. doi: 10.1007/s40257-017-0280-2 (PMC5602064; doi:10.1007/s40257-017-0280-2), 2017-04-20
Supplement: 40257_2017_280_MOESM1_ESM.pdf [file 40257_2017_280_MOESM1_ESM.pdf]

***BioDrugs***

**Assessing Pruritus in Hidradenitis Suppurativa: A Cross-sectional Study**

Allard R.J.V. Vossen, Annelien Schoenmakers, Kelsey R. van Straalen, Errol P. Prens,  
Hessel H. van der Zee

*Corresponding author*

Allard R.J.V. Vossen  
Department of Dermatology  
Erasmus University Medical Center  
Burgemeester s' Jacobplein 51  
3015 CA Rotterdam, The Netherlands  
E-mail address: a.vossen@erasmusmc.nl

ELECTRONIC SUPPLEMENTARY CONTENT

Supplement 1. The modified five-dimensional (5-D) itch scale

|    |                                                                                                                                      |                                                                                                                                                                                                                                                                                                                                                                                                                                                          |
|----|--------------------------------------------------------------------------------------------------------------------------------------|----------------------------------------------------------------------------------------------------------------------------------------------------------------------------------------------------------------------------------------------------------------------------------------------------------------------------------------------------------------------------------------------------------------------------------------------------------|
| 1. | <p><b>DURATION</b></p> <p><i>During the last two weeks, how many hours have you been itching?</i></p>                                | <p>&lt; 6 hours per day <input type="checkbox"/> <b>1</b></p> <p>6-12 hours per day <input type="checkbox"/> <b>2</b></p> <p>12-18 hours per day <input type="checkbox"/> <b>3</b></p> <p>18-23 hours per day <input type="checkbox"/> <b>4</b></p> <p>Whole day <input type="checkbox"/> <b>5</b></p>                                                                                                                                                   |
| 2. | <p><b>DEGREE</b></p> <p><i>Please rate the intensity of your itching in the past 2 weeks?</i></p>                                    | <p>Not present <input type="checkbox"/> <b>1</b></p> <p>Mild <input type="checkbox"/> <b>2</b></p> <p>Moderate <input type="checkbox"/> <b>3</b></p> <p>Severe <input type="checkbox"/> <b>4</b></p> <p>Unbearable <input type="checkbox"/> <b>5</b></p>                                                                                                                                                                                                 |
| 3. | <p><b>DIRECTION</b></p> <p><i>Over the past 2 weeks, has your itching gotten better or worse compared to the previous month?</i></p> | <p>Completely resolved <input type="checkbox"/> <b>1</b></p> <p><u>Much</u> better, but still present <input type="checkbox"/> <b>2</b></p> <p><u>Somewhat</u> better, but still present <input type="checkbox"/> <b>3</b></p> <p>Unchanged <input type="checkbox"/> <b>4</b></p> <p>Worsened <input type="checkbox"/> <b>5</b></p>                                                                                                                      |
| 4. | <p><b>DISABILITY</b></p> <p><i>A. What was the impact of itching on your sleep over the last two weeks?</i></p>                      | <p><u>Never</u> affects sleep <input type="checkbox"/> <b>1</b></p> <p><u>Occasionally</u> delays falling asleep <input type="checkbox"/> <b>2</b></p> <p><u>Often</u> delays falling asleep <input type="checkbox"/> <b>3</b></p> <p>Delays falling asleep and <u>occasionally</u> wakes me up at night <input type="checkbox"/> <b>4</b></p> <p>Delays falling asleep and <u>frequently</u> wakes me up at night <input type="checkbox"/> <b>5</b></p> |

|           |                                                                                                                                                                                                  |                                                                                                                                                                                                                                                                              |                                                                                                                                                                                                                          |
|-----------|--------------------------------------------------------------------------------------------------------------------------------------------------------------------------------------------------|------------------------------------------------------------------------------------------------------------------------------------------------------------------------------------------------------------------------------------------------------------------------------|--------------------------------------------------------------------------------------------------------------------------------------------------------------------------------------------------------------------------|
|           | <i>B. Did the itching influence your leisure or social activities over the last two weeks?</i>                                                                                                   | Not applicable <input type="checkbox"/><br>Never <input type="checkbox"/> <b>1</b><br>Rarely <input type="checkbox"/> <b>2</b><br>Occasionally <input type="checkbox"/> <b>3</b><br>Frequently <input type="checkbox"/> <b>4</b><br>Always <input type="checkbox"/> <b>5</b> |                                                                                                                                                                                                                          |
|           | <i>C. Did the itching influence your homework or errands over the last two weeks?</i>                                                                                                            | Not applicable <input type="checkbox"/><br>Never <input type="checkbox"/> <b>1</b><br>Rarely <input type="checkbox"/> <b>2</b><br>Occasionally <input type="checkbox"/> <b>3</b><br>Frequently <input type="checkbox"/> <b>4</b><br>Always <input type="checkbox"/> <b>5</b> |                                                                                                                                                                                                                          |
|           | <i>D. Did the itching influence your work or school over the last two weeks?</i>                                                                                                                 | Not applicable <input type="checkbox"/><br>Never <input type="checkbox"/> <b>1</b><br>Rarely <input type="checkbox"/> <b>2</b><br>Occasionally <input type="checkbox"/> <b>3</b><br>Frequently <input type="checkbox"/> <b>4</b><br>Always <input type="checkbox"/> <b>5</b> |                                                                                                                                                                                                                          |
| <b>5.</b> | <b>DISTRIBUTION</b><br><i>Mark whether itching has been present in the following bodyparts over the past 2 weeks. If a body part is not listed, choose the one that is closest anatomically.</i> | Head or scalp <input type="checkbox"/><br>Face <input type="checkbox"/><br>Chest <input type="checkbox"/><br>Armpits <input type="checkbox"/><br>Arms <input type="checkbox"/><br>Hands <input type="checkbox"/>                                                             | Abdomen <input type="checkbox"/><br>Back <input type="checkbox"/><br>Groins and genitals <input type="checkbox"/><br>Buttocks <input type="checkbox"/><br>Legs <input type="checkbox"/><br>Feet <input type="checkbox"/> |
